# Supplementary material
Source: MDPI journal article supplement (https://www.mdpi.com/2673-8007/3/4/81)
Supplement: s1 [file s1]

**Table S1.** Effect of BC-HYI on alpha diversity of intestinal microbiota of laying chickens.

| Items   | CON                  | LPS                  | B6                   | B7                   | B8                   | SEM  | <i>P-value</i> |
|---------|----------------------|----------------------|----------------------|----------------------|----------------------|------|----------------|
| Chao    | 469.21 <sup>Aa</sup> | 410.95 <sup>Bb</sup> | 416.49 <sup>Bb</sup> | 467.75 <sup>Aa</sup> | 457.68 <sup>Ab</sup> | 2.22 | 0.01           |
| ACE     | 471.35 <sup>Aa</sup> | 420.27 <sup>Bb</sup> | 426.85 <sup>Bb</sup> | 450.08 <sup>Ab</sup> | 469.30 <sup>Aa</sup> | 3.25 | 0.01           |
| Simpson | 0.08 <sup>Aa</sup>   | 0.11 <sup>Ab</sup>   | 0.08 <sup>Aa</sup>   | 0.07 <sup>Aa</sup>   | 0.08 <sup>Aa</sup>   | 0.01 | 0.04           |
| Shannon | 3.75 <sup>a</sup>    | 3.77                 | 3.95                 | 3.84                 | 3.82                 | 0.04 | 0.06           |

<sup>a, b</sup> Values within a row with different letters are significantly different at  $p < 0.05$ ; <sup>A, B</sup> Values within a row with different letters are statistically different at  $p < 0.01$ .

16S Data NCBI number: SUB9966958

**Table S2.** Effects of BC-HYI on the abundance of intestinal microbiota.

| Items                   | CON                 | LPS                 | B6                  | B7                  | B8                  | SEM  | <i>P-value</i> |
|-------------------------|---------------------|---------------------|---------------------|---------------------|---------------------|------|----------------|
| <i>Barnesiella</i>      | 18.76 <sup>Ab</sup> | 15.22 <sup>Aa</sup> | 23.54 <sup>Bb</sup> | 27.4 <sup>Bb</sup>  | 19.39 <sup>Ab</sup> | 1.12 | 0.01           |
| <i>Bacteroides</i>      | 11.64 <sup>Aa</sup> | 19.21 <sup>Ab</sup> | 3.58 <sup>Bb</sup>  | 9.64 <sup>Bc</sup>  | 6.18 <sup>Cc</sup>  | 1.44 | 0.01           |
| <i>Lactobacillus</i>    | 6.74 <sup>Aa</sup>  | 6.37 <sup>Aa</sup>  | 8.02 <sup>Ab</sup>  | 10.31 <sup>Bb</sup> | 21.65 <sup>Cc</sup> | 1.51 | 0.01           |
| <i>Blautia</i>          | 11.35 <sup>Aa</sup> | 8.50 <sup>Bb</sup>  | 9.54 <sup>Ab</sup>  | 5.36 <sup>Bb</sup>  | 6.18 <sup>Bc</sup>  | 0.60 | 0.02           |
| <i>Alistipes</i>        | 4.13 <sup>Aa</sup>  | 4.61 <sup>Aa</sup>  | 6.57 <sup>Ab</sup>  | 8.47 <sup>Bb</sup>  | 5.61 <sup>Ab</sup>  | 0.43 | 0.04           |
| <i>Lachnospiraceae</i>  | 6.17 <sup>Aa</sup>  | 4.07 <sup>Ab</sup>  | 6.33 <sup>Aa</sup>  | 4.65 <sup>Ab</sup>  | 4.79 <sup>Ab</sup>  | 0.26 | 0.03           |
| <i>Faecalibacterium</i> | 8.68 <sup>Aa</sup>  | 2.63 <sup>Bb</sup>  | 7.49 <sup>Aa</sup>  | 4.99 <sup>Ab</sup>  | 5.53 <sup>Ab</sup>  | 0.56 | 0.01           |
| <i>Clostridia</i>       | 4.10 <sup>Aa</sup>  | 6.13 <sup>Ab</sup>  | 4.70 <sup>Aa</sup>  | 6.43 <sup>Ab</sup>  | 2.80 <sup>Bb</sup>  | 0.37 | 0.03           |
| <i>Romboutsia</i>       | 1.65 <sup>Aa</sup>  | 7.5 <sup>Bb</sup>   | 2.19 <sup>Aa</sup>  | 1.19 <sup>Aa</sup>  | 2.13 <sup>Aa</sup>  | 0.62 | 0.02           |
| <i>Ruminococcus</i>     | 4.68 <sup>Aa</sup>  | 3.53 <sup>Aa</sup>  | 2.59 <sup>Aa</sup>  | 2.55 <sup>Aa</sup>  | 3.39 <sup>Aa</sup>  | 0.24 | 0.45           |

<sup>a, b</sup> Values within a row with different letters differ at  $p < 0.05$ ; <sup>A, B</sup> Values within a row with different letters differ at  $p < 0.01$ .

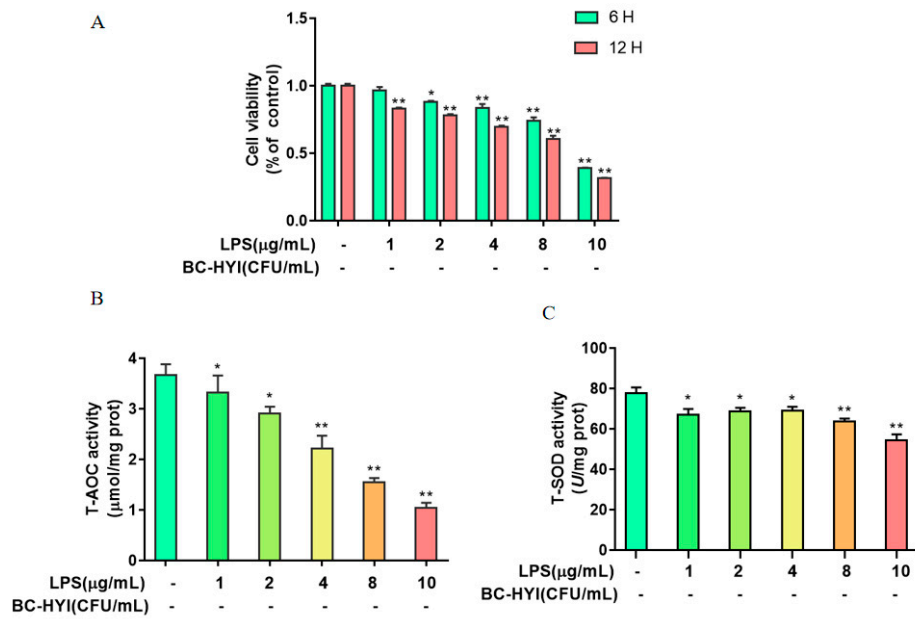

**Figure S1.** Effects of LPS on Viability and Oxidative Stress of DF-1 Cells. The results are representative of three independent experiments and expressed as means  $\pm$  SD. \* $p < 0.05$ , \*\* $p < 0.01$  compared with control group.
